# Supplementary material for: Seasonal and Regional Differences in Eating Times in a Representative Sample of the Brazilian Population
Source: MDPI journal article supplement (doi:10.3390/nu15184019), 2023-09-16
Supplement: s1 [file s1]

Table S3 – Means and standard deviation (SD) of the chrononutritional variables according to regions and seasons of Brazil.

|                                    | Regions       |               |               |               |               | Seasons       |               |
|------------------------------------|---------------|---------------|---------------|---------------|---------------|---------------|---------------|
|                                    | North         | Northeast     | Midwest       | Southeast     | South         | Spring-Summer | Fall-Winter   |
| <b>Chrononutritional variables</b> | Mean ± SD     |
| First Food Intake Time             | 07:32 ± 01:48 | 07:23 ± 01:22 | 07:35 ± 01:57 | 07:48 ± 01:02 | 07:57 ± 01:20 | 07:42 ± 01:24 | 07:39 ± 01:22 |
| Last Food Intake Time              | 19:49 ± 02:15 | 19:29 ± 01:56 | 19:50 ± 02:26 | 20:16 ± 01:13 | 20:29 ± 01:27 | 20:04 ± 01:43 | 19:59 ± 01:42 |
| Eating Midpoint                    | 13:40 ± 01:34 | 13:26 ± 01:15 | 13:42 ± 01:38 | 14:02 ± 00:50 | 14:13 ± 01:03 | 13:53 ± 01:12 | 13:49 ± 01:09 |

Values are in clock time (hh:min)
