# Supplementary material for: Seasonal and Regional Differences in Eating Times in a Representative Sample of the Brazilian Population
Source: MDPI journal article supplement (doi:10.3390/nu15184019), 2023-09-16
Supplement: s1 [file s1]

Figure S1 – Post-hoc analysis of first food intake time

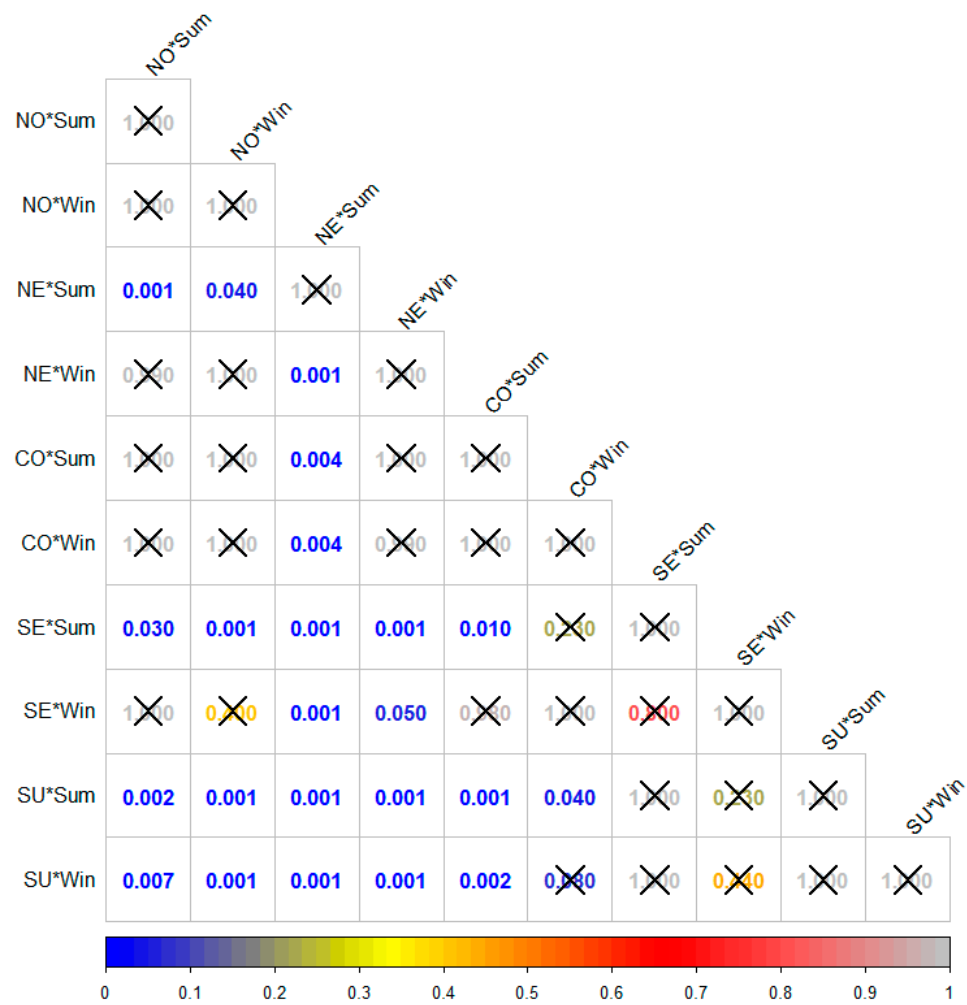

The p-values are described in each square. NO: North region; NE: Northeast region; CO: Midwest region; SE: Southeast region; SU: South region; Sum: Spring/Summer; Win: Fall/Winter.
