# Supplementary material for: Seasonal and Regional Differences in Eating Times in a Representative Sample of the Brazilian Population
Source: MDPI journal article supplement (doi:10.3390/nu15184019), 2023-09-16
Supplement: s1 [file s1]

Table S2 – Mean comparisons before and after DST according to regions of Brazil.

| Region                  | First food intake time |                        | Last food intake time  |                        | Eating midpoint        |                        |
|-------------------------|------------------------|------------------------|------------------------|------------------------|------------------------|------------------------|
|                         | Before DST             | After DST              | Before DST             | After DST              | Before DST             | After DST              |
|                         | (Sep 19, 2008)         | (Nov 19, 2008)         | (Sep 19, 2008)         | (Nov 19, 2008)         | (Sep 19, 2008)         | (Nov 19, 2008)         |
| South/Southeast/Midwest | 08:03<br>(06:30-09:35) | 07:41<br>(07:07-08:15) | 20:26<br>(19:27-21:24) | 19:26<br>(18:33-20:19) | 14:14<br>(12:59-15:29) | 13:34<br>(13:07-13:59) |
| North/Northeast         | 07:25<br>(06:23-08:28) | 07:02<br>(06:21-07:44) | 19:13<br>(18:38-19:49) | 18:04<br>(16:41-19:27) | 13:19<br>(12:59-13:40) | 12:33<br>(11:36-13:31) |

The initiation of Daylight Saving Time (DST) only took place in the South/Southeast/Midwest regions on October 19, 2008. The data presented here are reported as means with corresponding 95% confidence intervals (CI). Statistical analysis comparing the means of chrononutritional variables before and after DST revealed no significant differences.
