# Supplementary material for: Seasonal and Regional Differences in Eating Times in a Representative Sample of the Brazilian Population
Source: MDPI journal article supplement (doi:10.3390/nu15184019), 2023-09-16
Supplement: s1 [file s1]

Table S1 – Chrononutritional variables (mean and 95% CI) according to regions and seasons of Brazil.

|                                    | Brazil                     | North (n=3,003)             |                             | Northeast (n=7,504)                        |                                            | Midwest (n=2,963)          |                            | Southeast (n=4,545)                        |                                            | South (n=2,607)                            |                                            |
|------------------------------------|----------------------------|-----------------------------|-----------------------------|--------------------------------------------|--------------------------------------------|----------------------------|----------------------------|--------------------------------------------|--------------------------------------------|--------------------------------------------|--------------------------------------------|
|                                    |                            | Spring-<br>Summer           | Fall-<br>Winter             | Spring-<br>Summer                          | Fall-<br>Winter                            | Spring-<br>Summer          | Fall-<br>Winter            | Spring-<br>Summer                          | Fall-<br>Winter                            | Spring-<br>Summer                          | Fall-<br>Winter                            |
| <b>Chrononutritional variables</b> | Mean<br>(95% CI)           | Mean<br>(95% CI)            | Mean<br>(95% CI)            | Mean<br>(95% CI)                           | Mean<br>(95% CI)                           | Mean<br>(95% CI)           | Mean<br>(95% CI)           | Mean<br>(95% CI)                           | Mean<br>(95% CI)                           | Mean<br>(95% CI)                           | Mean<br>(95% CI)                           |
| First food intake time             | 07:41<br>(07:38-<br>07:43) | 07:35<br>(07:28-<br>07:43)  | 07:29<br>(07:22-<br>07:37)  | <b>07:16*</b><br><b>(07:12-<br/>07:20)</b> | <b>07:28*</b><br><b>(07:24-<br/>07:33)</b> | 07:33<br>(07:25-<br>07:41) | 07:37<br>(07:27-<br>07:46) | <b>07:54*</b><br><b>(07:46-<br/>08:03)</b> | <b>07:43*</b><br><b>(07:35-<br/>07:50)</b> | 07:58<br>08:05)                            | 07:57<br>(07:49-<br>08:04)                 |
| Last food intake time              | 20:01<br>(19:58-<br>20:05) | 19:47<br>(19:39-<br>19:55)  | 19:50<br>(19:41-<br>19:59)  | 19:29<br>(19:23-<br>19:35)                 | 19:29<br>(19:23-<br>19:35)                 | 19:51<br>(19:42-<br>20:01) | 19:48<br>(19:38-<br>19:58) | 20:19<br>(20:09-<br>20:29)                 | 20:13<br>(20:06-<br>20:21)                 | <b>20:37*</b><br><b>(20:28-<br/>20:45)</b> | <b>20:21*</b><br><b>(20:11-<br/>20:30)</b> |
| Eating midpoint                    | 13:51<br>(13:49-<br>13:53) | 13:41*<br>(13:35-<br>13:47) | 13:40*<br>(13:33-<br>13:46) | <b>13:22*</b><br><b>(13:18-<br/>13:26)</b> | <b>13:29*</b><br><b>(13:24-<br/>13:33)</b> | 13:42<br>(13:36-<br>13:49) | 13:42<br>(13:35-<br>13:49) | <b>14:07*</b><br><b>(14:00-<br/>14:13)</b> | <b>13:58*</b><br><b>(13:53-<br/>14:03)</b> | <b>14:17*</b><br><b>(14:11-<br/>14:23)</b> | <b>14:09*</b><br><b>(14:02-<br/>14:15)</b> |

Means are described in clock hours (hh:min).
