# Supplementary material for: Seasonal and Regional Differences in Eating Times in a Representative Sample of the Brazilian Population
Source: Nutrients. 2023 Sep 16;15(18):4019. doi: 10.3390/nu15184019 (PMC10535183; doi:10.3390/nu15184019)
Supplement: Supplementary file 1 [file nutrients-15-04019-s001.zip]

Archive with 5 entries (5 files):
- Santosetal_FigureS1.pdf
- Santosetal_FigureS2.pdf
- Santosetal_TableS1.pdf
- Santosetal_TableS2.pdf
- Santosetal_TableS3.pdf
